# Supplementary material for: Socioeconomic Effects of the Direct Procurement from Family Farming in the Brazilian School Feeding Program
Source: Research Square preprint supplement (doi:10.21203/rs.3.rs-7717673/v1), 2025-10-13
Supplement: Supplementary file 1 [file e19d3457bf8de6a043caf48e.docx]

**Supplementary appendix**Socioeconomic Effects of the Direct Procurement from Family Farming in the Brazilian School Feeding Program

**S1. Econometric model and its datasets**

We conduct an econometric analysis using a panel dataset from the Brazilian Agricultural Censuses of 2006 and 2017, including production value and pricing data by municipality and sector, stratified by family and non-family farming. The analysis also incorporates national food procurement data from FNDE, aligned with the 2017 census to evaluate the impact of PNAE regulations. More information about the data for the econometric exercise is provided in this supplementary appendix.

**S1.1. Brazilian Agricultural Census: 2006 and 2017**

The Brazilian Agricultural Census is a comprehensive survey conducted by the Brazilian Institute of Geography and Statistics (IBGE) to gather detailed information on the country's agricultural sector. The censuses for the years 2006 and 2017 provide extensive data on various aspects of agriculture, including the structure, production, and socio-economic conditions of agricultural establishments. Data were categorised by municipality and further stratified by family and non-family farming and their respective subsectors (agriculture; livestock; and forestry, fishery, and aquaculture) to match with the IO data. The IO data subdivides the agricultural sectors into those 3 considered. The treatment of the data involved converting all numbers to Brazilian thousands of reais (BRL) and generating the sectors.

The participation of family farmers and non-family farmers per agricultural sector, in terms of production value, is reported in Table S.1.

**Table S.1.1 – Distribution of total production by sector and type of farmer, 2006-2017**

| Sector | Non-family farmers | Family farmers | Total |
| --- | --- | --- | --- |
| Agriculture | 71·2% | 28·8% | 100% |
| Livestock | 39·8% | 60·2% | 100% |
| Forestry/Fishing | 76·7% | 23·3% | 100% |
| Total | 70·4% | 29·6% | 100% |

Most of the agricultural production, as well as forestry and fishing activities, are produced by family farmers. However, the production of livestock, in both Agricultural Census analysed, is slightly higher for family farmers.

**S.1.2 FNDE data**

Food procurement data are publicly accessible through the Accountability Management System (SiGPC) by FNDE. SiGPC reports information on both total PNAE purchases and family farming purchases since 2013. Data are available at the municipality level. FNDE stands for the "Fundo Nacional de Desenvolvimento da Educação," which translates to the National Fund for Educational Development. It is a federal agency in Brazil responsible for funding and implementing educational programs, including the National School Feeding Program (PNAE). The data on food procurement include information on the amounts and types of food purchased from different suppliers, which is critical for our analysis of how change in PNAE rules influence local agricultural production. In this analysis, we use the 2017 PNAE procurement data to align with the year of the agriculture census after the change in PNAE rules (post-treatment).

All Brazilian municipalities were (and still are) equally exposed to the PNAE rules and required to comply with the farm-to-school component. Thus, in our panel of agricultural production data, we have identified the municipalities that adhered to the PNAE rules governing food purchases from family farming in 2017 using FNDE data. As mentioned in the main sections of the paper, compliant municipalities are those whose expenditures comprised 30% or more of family farming products that year. Figure A.1 shows the distribution of school purchases by municipality in 2017. Note that approximately 42·7% of the municipalities have complied with the PNAE rules.

**Figure S.1.1 – Percentage of school purchases, family farmers, 2017**

We compare these compliant municipalities with non-compliant ones, the latter serving as control groups, using a DiD method. The final goal is to understand the impacts on the production value of agriculture, livestock and forestry from family farmers among compliers. We expect that the compliers have purchased more agricultural, livestock and forestry products from family farmers (a positive effect) and less from non-family farmers (a negative effect). To mitigate potential sample selection bias related to PNAE rule-compliant municipalities, we include municipal fixed effects (FEs), represented by a dummy variable for each municipality in the sample. These variables allow the regression to control for time-invariant characteristics of the municipalities that affect local agricultural production, such as agricultural suitability and the relevance of agricultural activities. Additionally, we consider time-fixed effects (dummy variables for 2017) and price covariates in our model to control for national aggregate shocks in 2017 that might have impacted production, as well as local market conditions that affected prices.

Our Two-Way Fixed Effects (TWFE) model involves two periods and two groups of comparison, thus mirroring a canonical setting of a DiD model (1). To further understand the selection problem of our sample, we have compared the treated and control groups in terms of some characteristics of schools in Table S.1.2, which presents differences in the mean for school characteristics aggregated to the municipal level. All variables represent the proportion of students in each municipality attending schools with the specified characteristic. For example, the variable 'Kitchen' indicates the proportion of students in a municipality who attend schools with a designated space and infrastructure to prepare meals on-site. Similarly, 'Cafeteria' represents the proportion of students in a municipality attending schools with a dedicated dining space. In the absence of a cafeteria, schools may provide meals through external catering or pre-prepared, ready-to-eat options, which are often ultra-processed products. These meals are typically consumed by students in classrooms, outdoor spaces, or other designated areas.

**Table S.1.2 – Mean comparison, treated and control groups**

|  | Control | Treated | Difference |
| --- | --- | --- | --- |
| Cafeteria | 0·2881 | 0·3748 | -0·0867*** |
| s.e. | 0·0002 | 0·0003 | 0·000345 |
|  |  |  |  |
| Kitchen | 0·7206 | 0·7573 | -0·0367*** |
| s.e. | 0·0002 | 0·0002 | 0·000271 |
|  |  |  |  |
| Public electricity | 0·7426 | 0·7682 | -0·0256*** |
| s.e. | 0·0002 | 0·0002 | 0·000261 |

We find statistical differences in some school characteristics of the sample. However, by including those variables as covariates in the regression, we do not find different results, as Table S.1.3 shows.

**Table S.1.3 - Impacts of complying with the rules of PNAE in 2017 on family farming production value, with and without school covariates**

|  | Agriculture | | Livestock | | Forestry/Fishing | |
| --- | --- | --- | --- | --- | --- | --- |
|  | (1) | (2) | (3) | (4) | (5) | (6) |
|  |  |  |  |  |  |  |
| Effect of PNAE rule | 0·0983*** | 0·0984*** | 0·0454*** | 0·0455*** | -0·0190*** | -0·0189*** |
|  |  |  |  |  |  |  |
| Mun FE | X | X | X | X | X | X |
| Sector FE | X | X | X | X | X | X |
| Year FE | X | X | X | X | X | X |
| Covariates: price | X | X | X | X | X | X |
| Other school covariates |  | X |  | X |  | X |

We then also assess the robustness of the choice of the control groups, as well as the choice of the treated groups. In Table S.1.4, we consider different sets of controls based on the percentile 10% (low), 25% (medium) and 50% (high) of the family farmer’s purchases for each sector. We observe that the results are robust to different choices of controls.

**Table S.1.4 - Impacts of complying with the rules of PNAE in 2017 on family farming production value, all sectors, different choices of control units**

|  | (1) | (2) | (3) | (4) |
| --- | --- | --- | --- | --- |
|  | All controls | vs Low | vs Medium | vs High |
|  |  |  |  |  |
| Panel A – Agriculture |  |  |  |  |
| Effect of PNAE rule | 0·098*** | 0·104*** | 0·101*** | 0·099*** |
|  | (0·001) | (0·002) | (0·002) | (0·002) |
|  |  |  |  |  |
| Panel B – Livestock |  |  |  |  |
| Effect of PNAE rule | 0·045*** | 0·046*** | 0·047*** | 0·046*** |
|  | (0·002) | (0·002) | (0·002) | (0·003) |
|  |  |  |  |  |
| Panel C - Forestry/Fishing |  |  |  |  |
| Effect of PNAE rule | -0·019*** | -0·017** | -0·019*** | -0·020** |
|  | (0·006) | (0·007) | (0·007) | (0·008) |
| Clustered standard errors in parentheses. P-values: * p<0·1, ** p<0·05, *** p<0·01 | | | |  |

We also examine the robustness of the choice of the treated groups. In Table S.1.5, we consider different sets of treated units based on the family farmers acquisitions higher than 25%, 30% and 35%. We observe that the results are robust to different choices of treated units.

**Table S.1.5 - Impacts of complying with the rules of PNAE in 2017 on family farming production value, all sectors, different choices of treated units**

|  | (1) | (2) | (3) |
| --- | --- | --- | --- |
|  | Treated > 25% | Treated > 30% | Treated > 35% |
|  |  |  |  |
| Panel A – Agriculture |  |  |  |
| Effect of PNAE rule | 0·098*** | 0·098*** | 0·097*** |
|  | (0·001) | (0·001) | (0·001) |
|  |  |  |  |
| Panel B – Livestock |  |  |  |
| Effect of PNAE rule | 0·045*** | 0·045*** | 0·045*** |
|  | (o·002) | (0·002) | (0·002) |
|  |  |  |  |
| Panel C - Forestry/Fishing |  |  |  |
| Effect of PNAE rule | -0·019*** | -0·019*** | -0·018*** |
|  | (0·006) | (0·006) | (0·006) |
| Clustered standard errors in parentheses. P-values: * p<0·1, ** p<0·05, *** p<0·01 | | | |

**S.2. Input-Output model**

We estimate a national Input-Output (IO) matrix disaggregated into family and non-family farming agriculture production and perform an impact analysis to quantify the effects of PNAE on the main macroeconomic variables. This section details the procedures and data employed in the disaggregation process and conceptualises the IO model for impact analysis.

**S.2.1. Disaggregating the agricultural sectors into family and non-family**

We used the IO matrix of 2017 (2) and reduced it from 68 sectors to 29 sectors given the limited availability of detailed statistical information on the flows of goods and other factors specific to family-related production. Table S.2.1 describes the 29 sectors.

**Table S.2.1 - Correspondence of sectors in the IO matrix**

| **Sectors** | **Description** |
| --- | --- |
| Agriculture (non-family) | Non-family farming agriculture |
| Agriculture (family farmers) | Family farming agriculture |
| Livestock (non-family) | Non-family farming livestock |
| Livestock (family farmers) | Family farming livestock |
| Forestry/Fishery (non-family | Non-family farming forest, fishery, and aquaculture |
| Forestry/Fishery (family farmers) | Family farming forest, fishery, and aquaculture |
| Extractive Sector | Extractive industries |
| Machinery and Equipment | Machinery and equipments |
| Food Beverages Industry | Food and beverage industries |
| Other Manufacturing | Other manufacturing industries |
| Elec. Gas | Electricity and gas supply |
| Water.Waste | Water supply, sewerage and waste management |
| Consumer Prod | Construction |
| Commerce | Sale and repair of motor vehicles and motorcycles |
| Transportation | Transport, Storage, and Communication |
| Accom. And Food services | Accommodation and food services |
| Info. Communication | Information and communication |
| Finance | Finance, Insurance, and others |
| Real Estate | Real Estate |
| Scient. Technical | Scientific, professional and technical activities |
| Administrative Services | Administrative activities and complementary services |
| Government Services | Government Services |
| Public Education | Public Education |
| Private Education | Private Education |
| Public Health | Public healthcare |
| Private Health | Private healthcare |
| Arts and Culture | Arts, culture, sports and recreational activities |
| Other Services | Other service activities |
| Domestic Services | Domestic services |

The Brazilian Agricultural Census (3) is the primary source for this type of information by economic activity, which was extensively used in the disaggregation process. Most of the IO components (e.g., intermediate consumption, final demand, etc.), including the gross value of production (GVP), were disaggregated using the share of family farming production to the production of the specific sector. This percentage of participation was calculated using the production data from the Agricultural Census in Brazilian Reais (R$). For instance, the 2017 Agricultural Census reported that family farmers contributed 33% of total livestock production that year, while the remaining 67% came from non-family farming operations, as presented in Table S.2.2.

**Table S.2.2 – Shares for labour, wages and GVP based on the Agricultural Census**

| **Sectors** | **Labour** | **Wages** | **GVP** |
| --- | --- | --- | --- |
| Agriculture (non-family) | 34% | 89% | 82% |
| Agriculture (family farmers) | 66% | 11% | 18% |
| Livestock (non-family) | 32% | 71% | 67% |
| Livestock (family farmers) | 68% | 29% | 33% |
| Forestry/Fishery (non-family) | 37% | 98% | 81% |
| Forestry/Fishery (family farmers) | 63% | 2% | 19% |

Within the IO framework, money flows from the family farming sector through the economy through its purchases and payments to the factors of production and imports (intermediate inputs). Monetary payments to the family farming sectors result from their sales to other industries and final demand consumers. We used the expenditures data of the Agricultural Census, although it contains sectoral information that is highly aggregated (this is the reason behind the decision to reduce the number of sectors in the IO matrix). When sectoral matching was possible, we used the data for the specific sector. In the lack of a direct match, we adopted proxies by selecting a product of the sector for which data was available in the agricultural census, corresponding to each sector where family farming sells its goods. For imports, we applied data on the use of fertilizers and pesticides, which are mainly imported. A summary of key variables is presented in Table S.2.3.

**Table S.2.3 - List of some variables from the Agricultural Census**

| **Variables** |
| --- |
| Land lease |
| Hiring of services |
| Wages paid |
| Fertilizers and soil correctives |
| Seeds and seedlings |
| Purchase of animals |
| Pesticides |
| Animal medications |
| Salt, feed, and other supplements |
| Transportation of production |
| Electric power |
| Purchase of machinery and vehicles |
| Fuels and lubricants |
| New permanent crops and forestry |
| Pasture formation |
| Other expenses |
| Revenues from establishment production |
| Variable - Value of agricultural establishment production (Thousand Reais) |
| Number of agricultural establishments with employed personnel |
| Share of taxes and fees in expenses |

The disaggregation of the sales involved several specific assumptions due to the limited data on the purchasers of family farming production. There is no database displaying the ideal level of detail, and the literature is very scarce. The intermediate consumption estimation was primarily based on the observation of the IO tables in each sector being disaggregated. When data was unavailable, the GVP share of family farming from the Agricultural Census was used as a proxy. Sales to public education were broken down using SIGPC.

For the final demand (household consumption, government consumption, exports, investments and inventory change), we obtained information from different sources, namely: a) Embrapa for household consumption, b) the Safra Plan 2016-2017 (a federal government programme that provides public resources allocation to finance and ensure the agricultural production of small, medium, and large producers in Brazil), c) Comexstat (an online platform providing comprehensive and detailed data on Brazil's foreign trade, including information on exports and imports), d) investments and inventory change from the Agricultural Census, based on data on investments made in the family farming establishments to improve infrastructure, including machinery and equipment. The information regarding the export destination of family farming production is not publicly available. Thus, the share of family farming production exported was estimated considering that the relative participation of a basket of domestic family farming products corresponds to its exported proportion. For that purpose, data from the Census alongside Comextat were collected for each agricultural, livestock, and forest/fishery/aquaculture sector product. Data refers to 2017, and they report values for municipalities and federation units. In the end, the RAS method (4) was applied in order to rebalance the disaggregated IO matrix. It consists of an iterative algorithm that balances row and column totals.

**S.2.2. Conceptual details of the input-output impact analysis**

The model solution is represented through the equation and the impact analysis is described in Equation 2:

(1)

(2)

where x is the sectorial output; I is the identity matrix; is the Leontief Inverse matrix; A is the technological coefficient matrix defined as ; *zij* is the trade relation between sectors; *i j* and *j*; *y* is the final demand vector. Sectoral multiplier effects can be calculated from the Leontief inverse matrix, which measures the total economic impact following a change in exogenous final demand on all endogenous sectors of the economy. Different types of multipliers exist for different variables, such as production, employment, income, and taxes. Except for production, all other variables require a related coefficient representing the amount of it that meets the total production to calculate the corresponding multiplier.

*−*

*x*

As described in equation 3, a variation in the final demand due to PNAE procurement ∆Y implies changes in the output of the economy ∆*X*. This is the simplest form of the input-output model and from which we can obtain direct and indirect outcomes. Besides the output effects, it can be further extended to calculate the sectoral impacts on other economic variables such as employment and tax collection, as depicted in equation 4, in which is a diagonal matrix formed by coefficients of the selected variable:

(3)

**References**

1. Callaway B, Sant’Anna PHC. Difference-in-Differences with multiple time periods. Journal of Econometrics. 2021;225(2):200–30.

2. NEREUS-USP. Matrizes de insumo-produto [Internet]. 2021. Available from: http://www.usp.br/nereus/?fontes=dados-matrizes

3. IBGE. Censo Agropecuário 2017 [Internet]. Instituto Brasileiro de Geografia e Estatística; 2018 [cited 2022 Oct 7]. Available from: https://www.ibge.gov.br/

4. Holý V, Šafr K. Disaggregating input–output tables by the multidimensional RAS method: a case study of the Czech Republic. Economic Systems Research. 2023 Jan 2;35(1):95–117.
